# Supplementary material
Source: ML conference proceedings conference paper supplement (https://proceedings.neurips.cc/paper_files/paper/2022/hash/e7599c4b309e39e444a7dcf92572fae1-Abstract.html)
Supplement: Supplementary file 1 [file e7599c4b309e39e444a7dcf92572fae1-Supplemental-Conference.zip]

Archive with 8 entries (7 files):
- supplementary 2/
- __MACOSX/._supplementary 2
- supplementary 2/full_paper.pdf
- __MACOSX/supplementary 2/._full_paper.pdf
- supplementary 2/.DS_Store
- __MACOSX/supplementary 2/._.DS_Store
- supplementary 2/Experiments.ipynb
- __MACOSX/supplementary 2/._Experiments.ipynb
