# Supplementary material
Source: ML conference proceedings conference paper supplement (https://proceedings.neurips.cc/paper_files/paper/2022/hash/e7599c4b309e39e444a7dcf92572fae1-Abstract.html)
Supplement: Supplementary file 1 [file e7599c4b309e39e444a7dcf92572fae1-Supplemental-Conference.zip › supplementary 2/Experiments.ipynb]

# %% [markdown]
# Code

# %% [code]
import numpy as np
import time
from numba import jit
from scipy.spatial import distance_matrix
import os
import h5py
import matplotlib.pyplot as plt

# %% [code]
# Algorithm for L1 matrix vector query

def preprocess(X):
    return np.argsort(X, axis=0), np.argsort(np.argsort(X, axis=0), axis=0)

@jit(nopython=True)
def inner_loop(X,order,B,C,n,d):
    z = np.zeros(n)
    for k in range(n):
        for i in range(d):
            q = order[k, i]
            S1 = B[q,i]
            S2 = B[n-1,i] - B[q,i]
            S3 = C[q,i]
            S4 = C[n-1,i] - C[q,i]
            z[k] += X[k,i]*(S3-S4) + S2-S1
    return z
    

def query(X, order1, order2, y):
    n,d = X.shape
    B = np.take_along_axis((((X.T)*y).T), order1, axis=0).cumsum(axis=0)
    C = (y[order1.T].T).cumsum(axis=0)
    return inner_loop(X,order2,B,C,n,d)

@jit(nopython=True)
def naive(X, y):
    n,d = X.shape
    z = np.zeros(n)
    for i in range(n):
        for j in range(n):
            z[i] += (np.abs(X[i,:] - X[j,:]).sum())*y[j]
    return z
            

# %% [markdown]
# MNIST

# %% [code]
# Need to first load the standard MNIST dataset
# Time to create MNIST distance matrix
start = time.time()
dist_matrix_mnist = distance_matrix(train_images[:50000,:],train_images[:50000,:],p=1).astype(np.float32)
print(time.time() - start)

# %% [code]
# Our preprocessing times
start = time.time()
order1, order2 = preprocess(train_images[:50000,:])
print(time.time()-start)

# %% [code]
# Query time using the distance matrix
total_time = []
for i in range(5):
    y = np.random.random(50000)
    start = time.time()
    output1 = dist_matrix_mnist.dot(y)
    total_time.append(time.time()-start)
print(total_time)

# %% [code]
# Query time of our algorithm
total_time2 = []
for i in range(10):
    y = np.random.random(50000)
    start = time.time()
    output2 = query(train_images[:50000,:],order1, order2, y)
    total_time2.append(time.time()-start)
print(total_time2)

# %% [code]
print(np.mean([40.88059997558594, 38.402283906936646, 38.69560098648071, 37.60749077796936, 37.618812799453735]))
print(np.mean([1.8774049282073975, 1.834322214126587, 1.8389580249786377, 1.855522871017456, 1.8549790382385254, 1.8368868827819824, 1.8431248664855957, 1.848099946975708, 1.8464722633361816, 1.8517050743103027]))

# %% [markdown]
# Glove Dataset

# %% [code]
filename = "glove-50-angular.hdf5"
# Need to download dataset from https://github.com/erikbern/ann-benchmarks/


with h5py.File(filename, "r") as f:
    points = np.array(f['train']) 

print(points.shape)

# %% [code]
# Naive runtime, only works for a small input!

start = time.time()
y = np.random.random(50000)
output = naive(points[:50000,:], y)
print(time.time()-start)

# %% [code]
# Estimate how long naive will take on whole dataset in days
(400*(points.shape[0]/50000)**2)/(60*60*24)

# %% [code]
# Preprocessing for our L1 algorithm
start = time.time()
order1, order2 = preprocess(points)
print(time.time()-start)

# %% [code]
# Print our query time. Note, might need to run this multiple times or first run it on a small sample to properly initialize Numba
y = np.random.random(points.shape[0])
start = time.time()
output2 = query(points,order1, order2, y)
print(time.time()-start)

# %% [markdown]
# Gaussian Mixture

# %% [code]
# Create dataset
points = np.random.normal(size = (17000,50))
points = np.vstack((points, np.random.normal(size = (17000,50)) + 5))
points = np.vstack((points, np.random.normal(size = (17000,50)) - 5))
print(points.shape)

# %% [code]
# Create distance matrix
start = time.time()
dist_matrix_mixture = distance_matrix(points, points,p=1).astype(np.float32)
print(time.time()-start)

# %% [code]
# Preprocess using our algorithm
start = time.time()
order1, order2 = preprocess(points)
print(time.time()-start)

# %% [code]
# Compare query times of using the distance matrix vs using our algorithm
total_time = []
for i in range(5):
    y = np.random.random(51000)
    start = time.time()
    output1 = dist_matrix_mixture.dot(y)
    total_time.append(time.time()-start)
print(total_time)
print(np.mean(total_time))


total_time2 = []
for i in range(10):
    y = np.random.random(51000)
    start = time.time()
    output2 = query(points,order1, order2, y)
    total_time2.append(time.time()-start)
print(total_time2)
print(np.mean(total_time2))
